# Supplementary material for: Upconversion Fluorescence Resonance Energy Transfer Aptasensors for H5N1 Influenza Virus Detection
Source: PubMed Central journal article supplement — ACS Omega. 2021 Jun 4;6(23):15236–45. doi: 10.1021/acsomega.1c01491 (PMC8210407; doi:10.1021/acsomega.1c01491), 2021-06-04
Supplement: ao1c01491_si_001.pdf [file ao1c01491_si_001.pdf]

## Supporting Information

# An upconversion fluorescent resonant energy transfer aptasensor for H5N1 influenza virus detection

Qiuzi Zhao,<sup>a</sup> Ping Du,<sup>b</sup> Xiaoyong Wang,<sup>b</sup> Mengqian Huang,<sup>a</sup> Ling-Dong Sun,<sup>b</sup> Tao Wang,<sup>a\*</sup> and Zhiyun Wang<sup>c\*</sup>

<sup>a</sup> School of Life Sciences, Tianjin University, 92 Weijin Road, Nankai District, Tianjin, 300072, China

<sup>b</sup> Beijing National Laboratory for Molecular Sciences, State Key Laboratory of Rare Earth Materials Chemistry and Applications, PKU-HKU Joint Laboratory in Rare Earth Materials and Bioinorganic Chemistry, College of Chemistry and Molecular Engineering, Peking University, 202 Chengfu Road, Haidian District, Beijing, 100871, China

<sup>c</sup> School of Environmental Science and Engineering, 135 Yaguang Road, Jinnan District, Tianjin, 300350, China

### **Coreponding Author**

\*E-mail: wangtaobio@tju.edu.cn

\*E-mail: zhiyun\_wang@tju.edu.cn



## Supplementary Figures

### 1. Feasibility of FRET system based on H5N1 HA aptamer

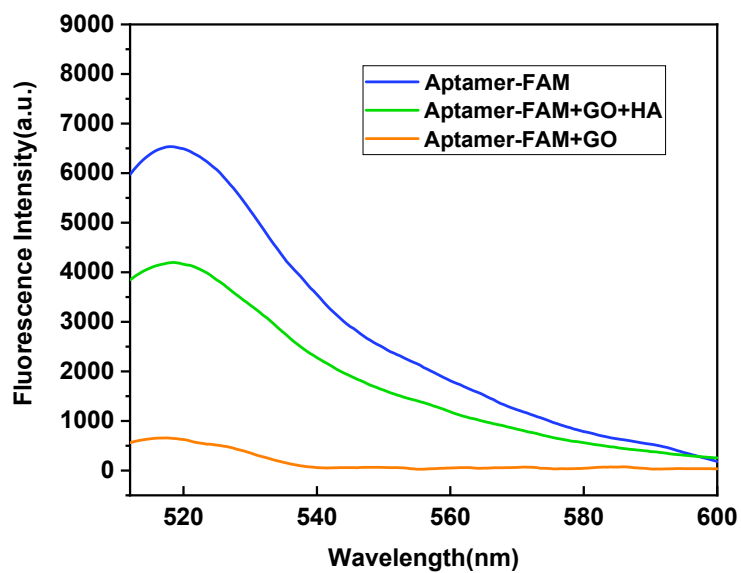

**Figure S1.** The typical fluorescent emission spectra of different mixtures. The concentrations of Aptamer-FAM, GO and HA were 10 nM, 50  $\mu\text{g m L}^{-1}$  and 50  $\text{ng mL}^{-1}$ . (The excitation was set at 495 nm and the emission spectra were collected from 510 nm to 600 nm)

**2.The TEM image of UCNPs-Apt on GO sheet in the presence of HA**

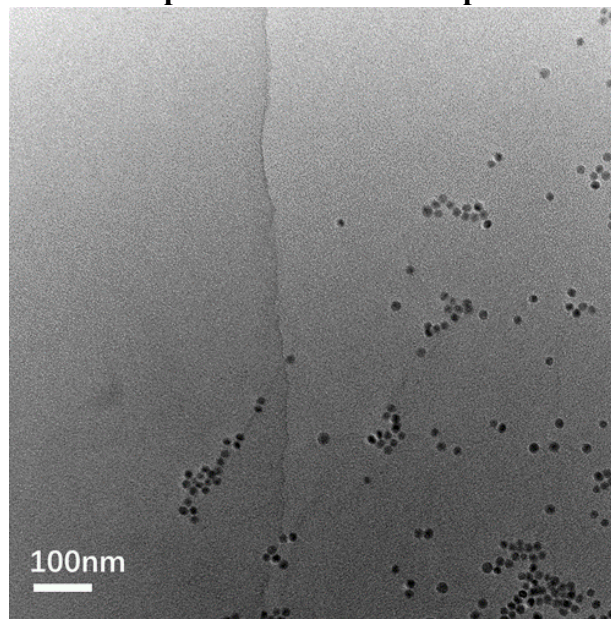

**Figure S2.**The TEM image of UCNPs-Apt ( $0.05 \text{ mg mL}^{-1}$ ) on GO sheet ( $50 \text{ } \mu\text{g m L}^{-1}$ ) in the presence of HA( $50 \text{ ng mL}^{-1}$ ).

### 3.The fluorescence spectrum in human serum samples

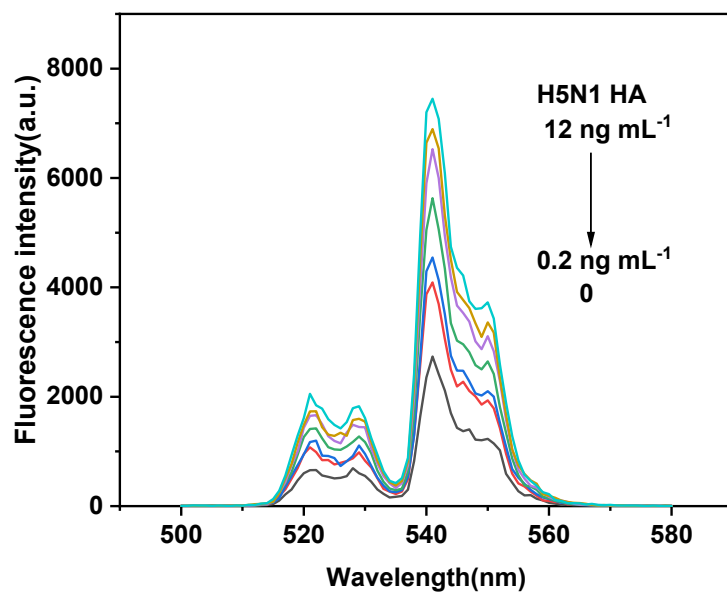

**Figure S3.** The fluorescence spectra regarding quantitative detection of HA in human serum for different concentrations of HA (0, 0.2, 0.5, 1, 2, 5, 7, 12 ng mL<sup>-1</sup>)



#### 4. The relationship between commercial standard ELISA kits and this method

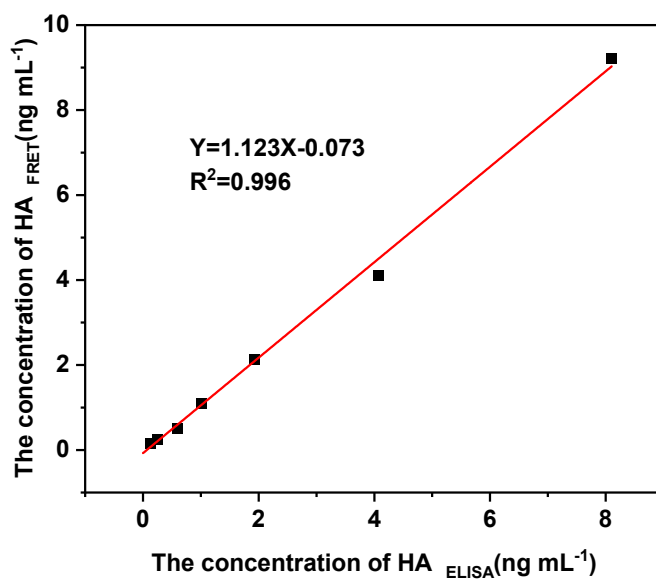

**Figure S4.** The relationship between commercial standard ELISA kits and this method.





## 5. Between-group repeated measures HA

**Table S1.** Inter-assay precision of Aptamer-SWUCNPs/GO platform in serum samples.

| Samples | Volume of addition (ng mL <sup>-1</sup> ) | Found±SD (ng mL <sup>-1</sup> ) | Recovery (%) | RSD (%)<br>n=3 |
|---------|-------------------------------------------|---------------------------------|--------------|----------------|
| 1       | 2                                         | 2.29±0.152                      | 114.50       | 6.63           |
| 2       | 5                                         | 5.37±0.425                      | 107.43       | 9.78           |
| 3       | 7                                         | 6.91±0.262                      | 98.71        | 3.79           |
| 4       | 10                                        | 9.53±0.922                      | 95.37        | 9.67           |
| 5       | 12                                        | 12.35±0.273                     | 102.91       | 2.21           |



## 6.Stability of probes

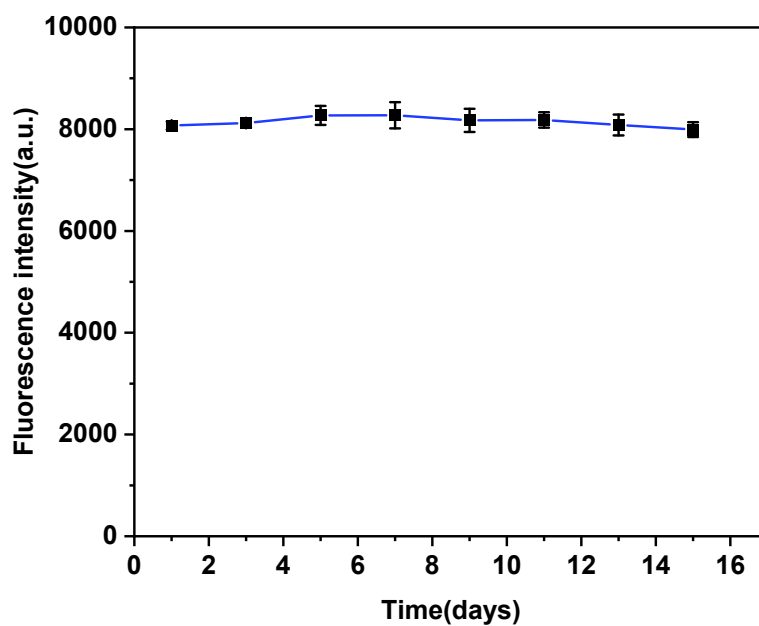

**Figure S5.** The fluorescence intensity was measured in the period of 15 days. The concentrations of UCNP-Apt was  $0.05 \text{ mg mL}^{-1}$ . Error bars represented the standard deviation of three parallel testing.

## 7. A comparison between present HA of H5N1 virus biosensor and other biosensors

**Table S2.** Comparison of this work with other methods for the detection of HA protein of H5N1

| No. | Detection Methods | Materials                                          | Linear range (ng mL <sup>-1</sup> ) | LOD (ng mL <sup>-1</sup> ) | Reference  |
|-----|-------------------|----------------------------------------------------|-------------------------------------|----------------------------|------------|
| 1   | Electrochemical   | indium-tin-oxide thin-film transistors (ITO TFTs). | 5 - 5000                            | 0.08                       | 4          |
| 2   | ELISA             | Immunowall Device                                  | 0.23-100                            | 0.23                       | 5          |
| 3   | Fluorescence      | Aptamer / Ag@SiO <sub>2</sub> nanoparticle         | 2-100                               | 2                          | 6          |
| 4   | Immunoassay       | Enzyme-encapsulated liposome                       | 0.1-4                               | 0.04                       | 7          |
| 5   | LSPR              | MF-DNA /hAuSN                                      | 0.0857-857                          | 0.0857                     | 8          |
| 6   | DPV               | Methylene blue-electroadsorbed graphene            | 2.14-8.57                           | 0.711                      | 9          |
| 7   | Fluorescence      | Aptamer-SWUCNP/GO                                  | 0.1-15                              | 0.0609                     | This study |



## References

- (1) Shiratori, I.; Akitomi, J.; Boltz, D.; Horii, K.; Furuichi, M.; Waga, I. J. B.; communications, b. r., Selection of DNA aptamers that bind to influenza A viruses with high affinity and broad subtype specificity. *Biochem. Biophys. Res. Commun.* **2014**, *443* 1, 37-41.
- (2) Dong, H.; Sun, L. D.; Feng, W.; Gu, Y.; Li, F.; Yan, C. H. J. A. N., Versatile Spectral and Lifetime Multiplexing Nanoplatfrom with Excitation Orthogonalized Upconversion Luminescence. *Acs Nano* **2017**, *11*, 3289-3297.
- (3) Dong, A.; Ye, X.; Chen, J.; Kang, Y.; Gordon, T.; Kikkawa, J. M.; Murray, C. J. J. o. t. A. C. S., A generalized ligand-exchange strategy enabling sequential surface functionalization of colloidal nanocrystals. *J. Am. Chem. Soc.* **2011**, *133* 4, 998-1006.
- (4) Ye, W. W.; Tsang, M.-K.; Liu, X.; Yang, M.; Hao, J., Upconversion Luminescence Resonance Energy Transfer (LRET)-Based Biosensor for Rapid and Ultrasensitive Detection of Avian Influenza Virus H7 Subtype. *Small* **2014**, *10*, 2390-2397.
- (5) Chavez Ramos, K.; Nishiyama, K.; Maeki, M.; Ishida, A.; Tani, H.; Kasama, T.; Baba, Y.; Tokeshi, M., Rapid, Sensitive, and Selective Detection of H5 Hemagglutinin from Avian Influenza Virus Using an Immunowall Device. *Acs Omega* **2019**, *4*, 16683-16688.
- (6) Pang, Y.; Rong, Z.; Wang, J.; Xiao, R.; Wang, S., A fluorescent aptasensor for H5N1 influenza virus detection based-on the core-shell nanoparticles metal-enhanced fluorescence (MEF). *Biosensors & Bioelectronics* **2015**, *66*, 527-532.
- (7) Lin, C.; Guo, Y.; Zhao, M.; Sun, M.; Luo, F.; Guo, L.; Qiu, B.; Lin, Z.; Chen, G., Highly sensitive colorimetric immunosensor for influenza virus H5N1 based on enzyme-encapsulated liposome. *Anal. Chim. Acta* **2017**, *963*, 112-118.
- (8) Lee, T.; Kim, G. H.; Kim, S. M.; Hong, K.; Kim, Y.; Park, C.; Sohn, H.; Min, J., Label-free localized surface plasmon resonance biosensor composed of multi-functional DNA 3 way junction on hollow Au spike-like nanoparticles (HAuSN) for avian influenza virus detection. *Colloids and Surfaces B-Biointerfaces* **2019**, *182*.
- (9) Veerapandian, M.; Hunter, R.; Neethirajan, S., Dual immunosensor based on methylene blue-electroadsorbed graphene oxide for rapid detection of the influenza A virus antigen. *Talanta* **2016**, *155*, 250-257.
